# Supplementary material for: Coconut-husk derived graphene for supercapacitor applications: comparative analysis of polymer gel and aqueous electrolytes
Source: Royal Society of Chemistry journal article supplement (doi:10.1039/d3ma00126a), 2023-01-01
Supplement: d3ma00126a1.pdf [file d3ma00126a1.pdf]

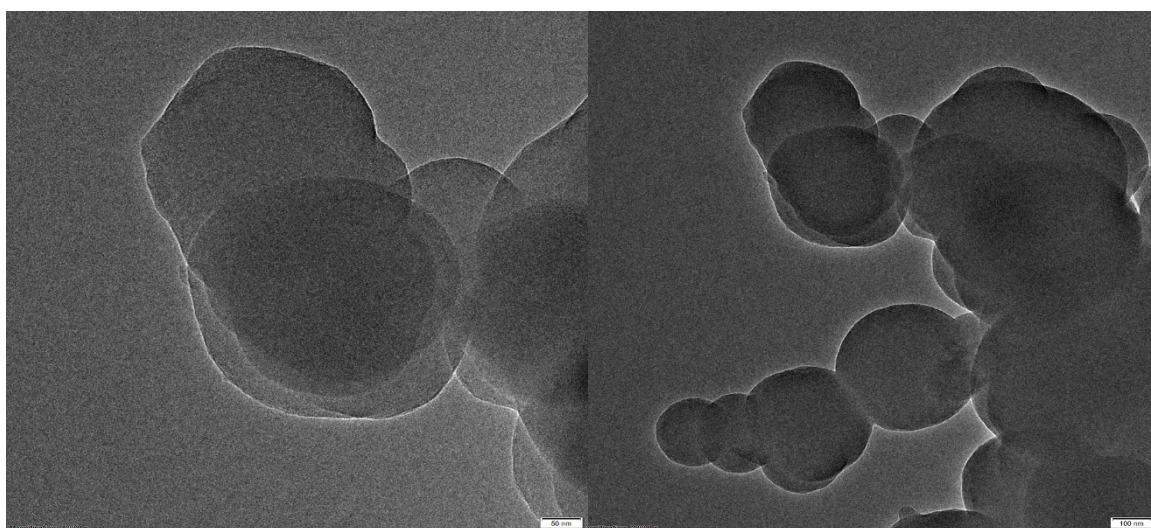

**Supplementary Figure 1.** TEM images at different magnifications.

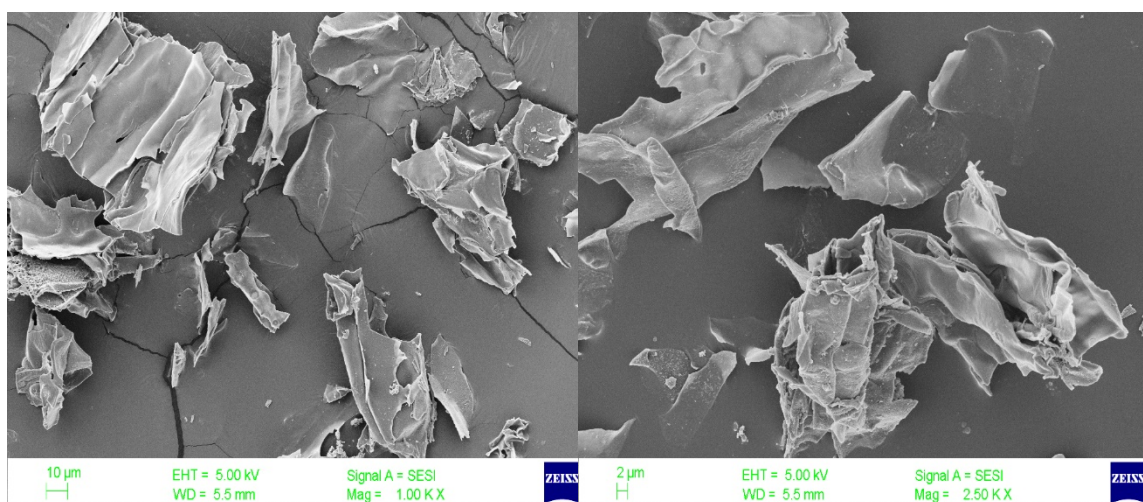

**Supplementary Figure 2.** SEM images at different magnifications.

**Spectrum**

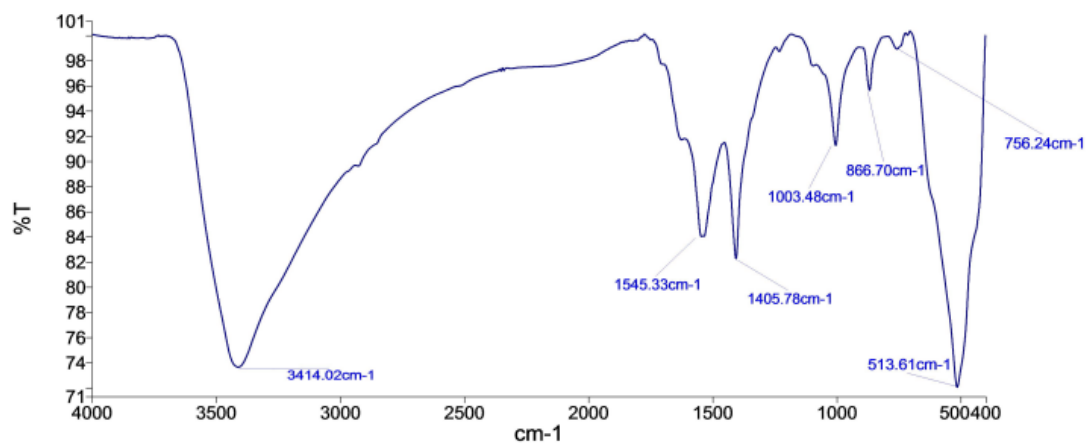

**Supplementary Figure 3.** FT-IR data of the sample.
